# Supplementary material
Source: PubMed Central journal article supplement (PMC3754013)
Supplement: JVI.01161-13_zjv999098063so1.pdf [file JVI.01161-13_zjv999098063so1.pdf]

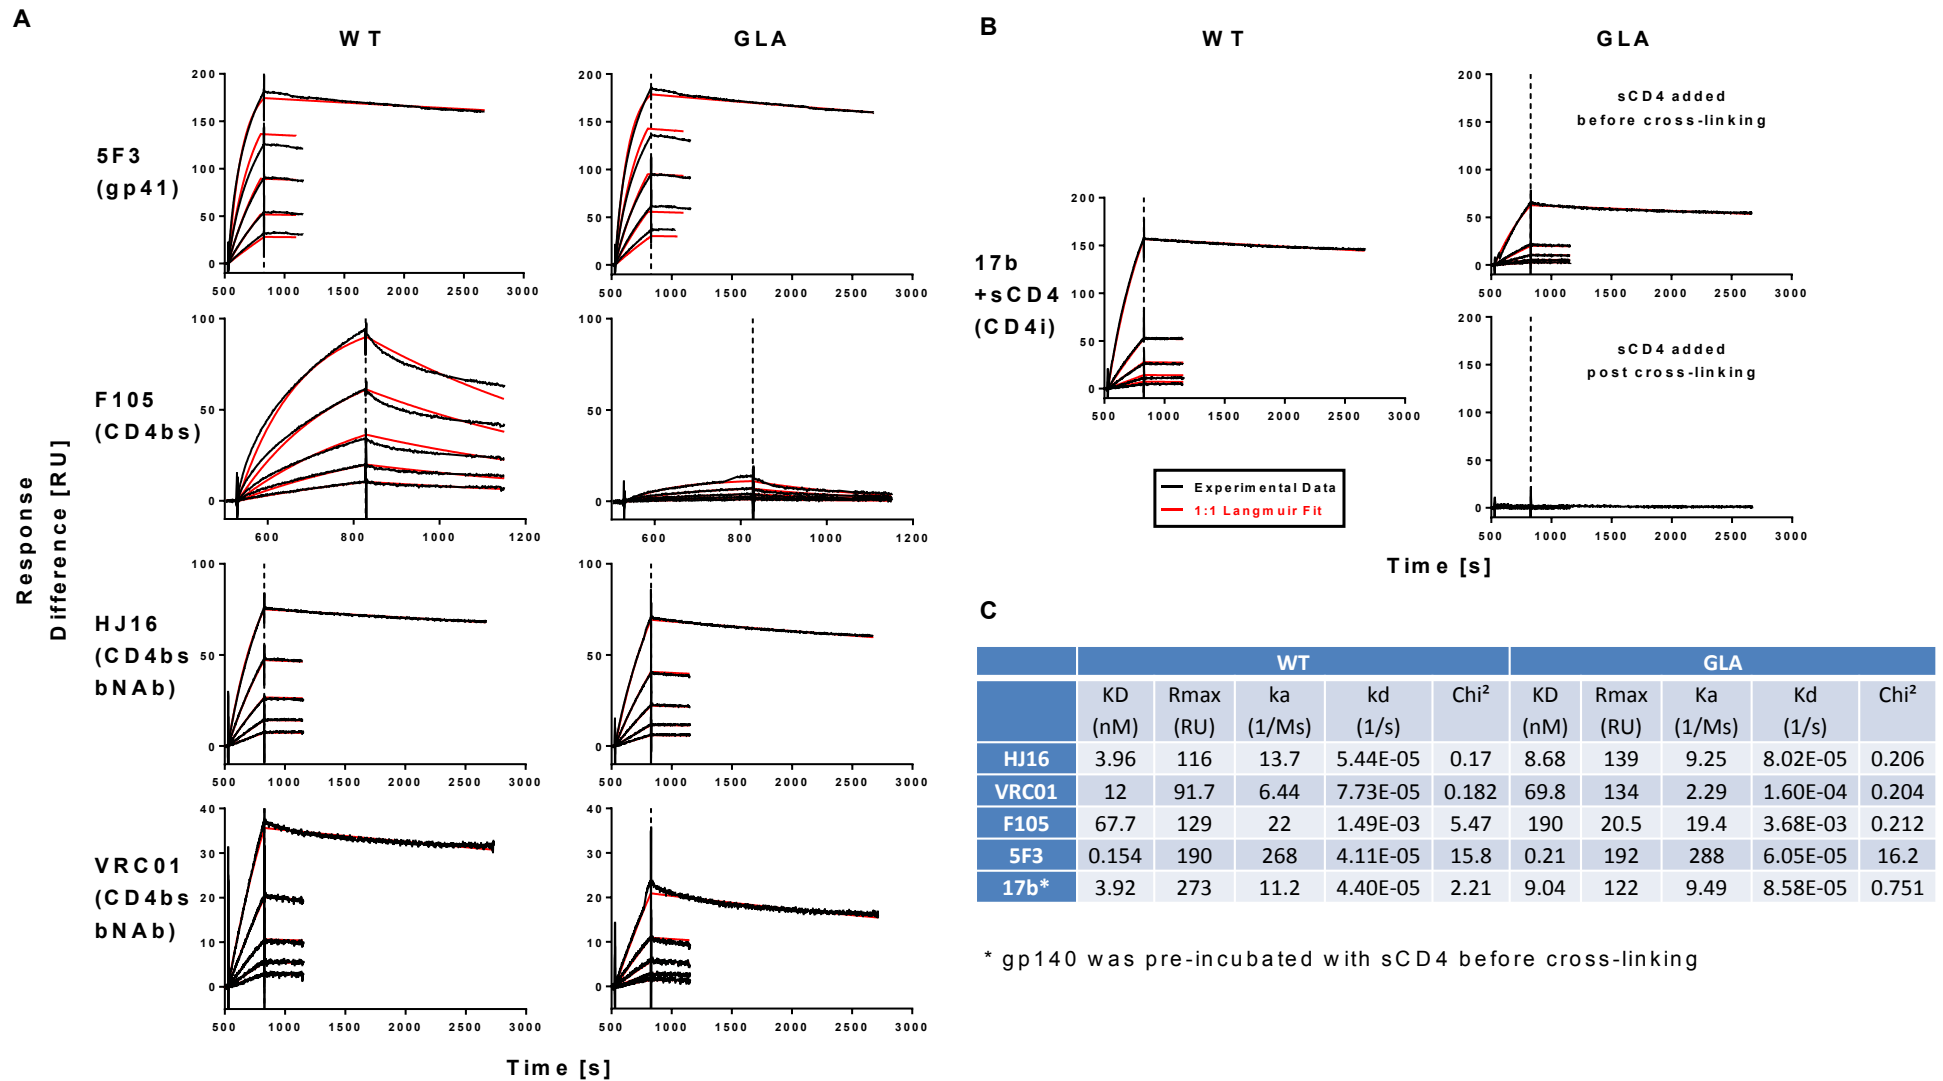

**Supplementary Fig. 1: SPR analysis of the antigenicity of GLA cross-linked gp140. A+B:** Titration series of unmodified (WT) or cross-linked (GLA) gp140 were passed over mAbs as indicated. Black curves show experimental data, red lines indicate results of a 1:1 langmuir analysis and vertical black lines show the end of the gp140 injection. B: sCD4 was added to gp140 either before (top right) or after (bottom right) cross-linking and samples were analysed as in A. C: Table shows the results from the 1:1 Langmuir analysis.

CD4

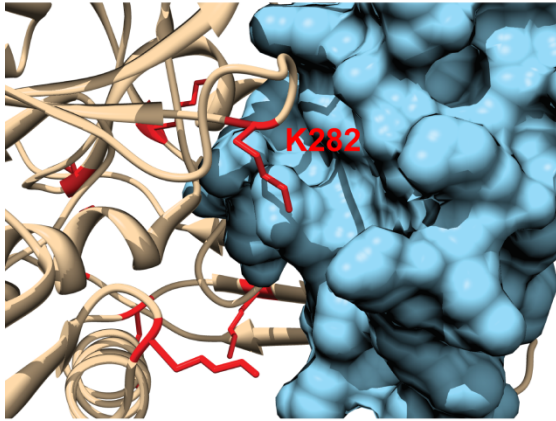

17b

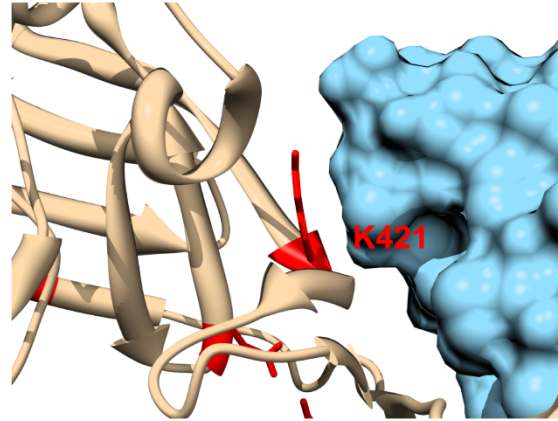

F105

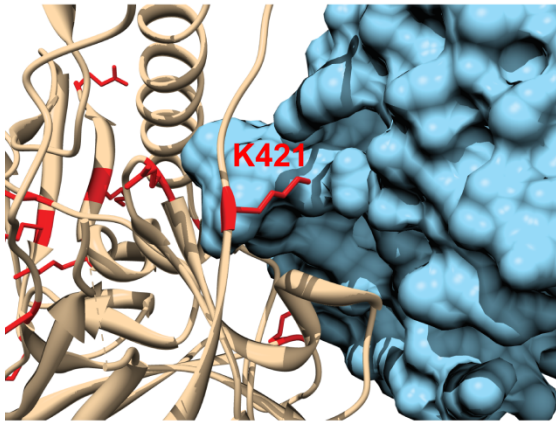

b12

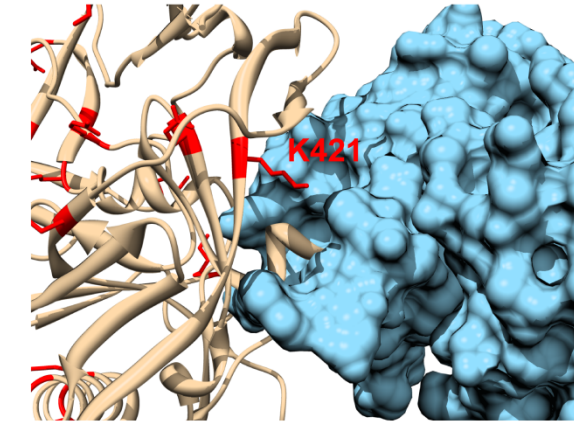

VRC01

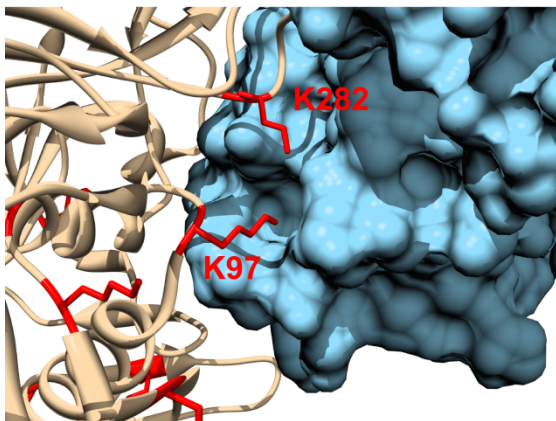

PG9

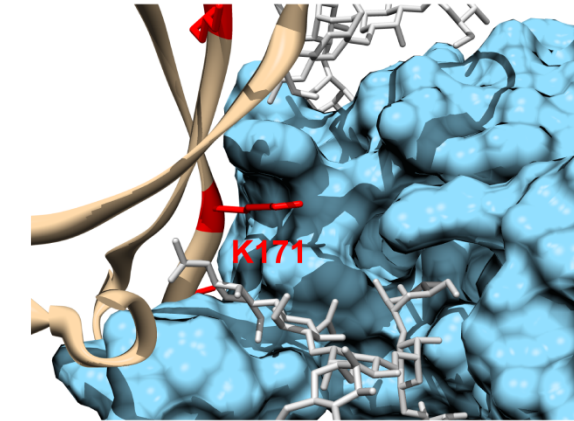

**Supplementary Fig. 2: Modification sites within mAb epitopes.**

Ribbon representations of gp120 or gp120 fragments (fawn) are shown in complex with blue surface representations of CD4 or mAbs as indicated. Potential modification sites (lysine residues) are shown in red and residue numbers of lysines interacting with mAbs are labelled in red according to HXB2 numbering. Lysine residues were identified based on the sequence of strain CN54 except for PG9, in which case the sequence of strain UG37 was used consistent with the experiments performed in this study. PG9 interacts with a second lysine of UG37 (K168), which is shielded from view by PG9 in this orientation.

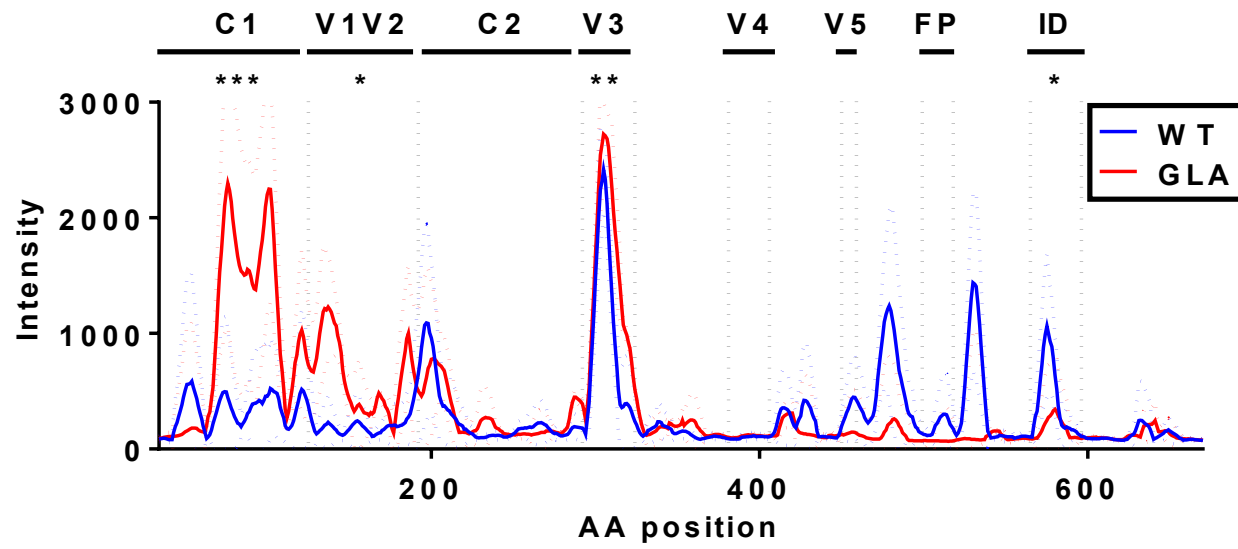

**Supplementary Fig. 3: Homologous peptide scanning of week 24 serum responses.**

Dotted curves indicated SD of 4 animals tested, dotted vertical lines indicated borders of epitopes.

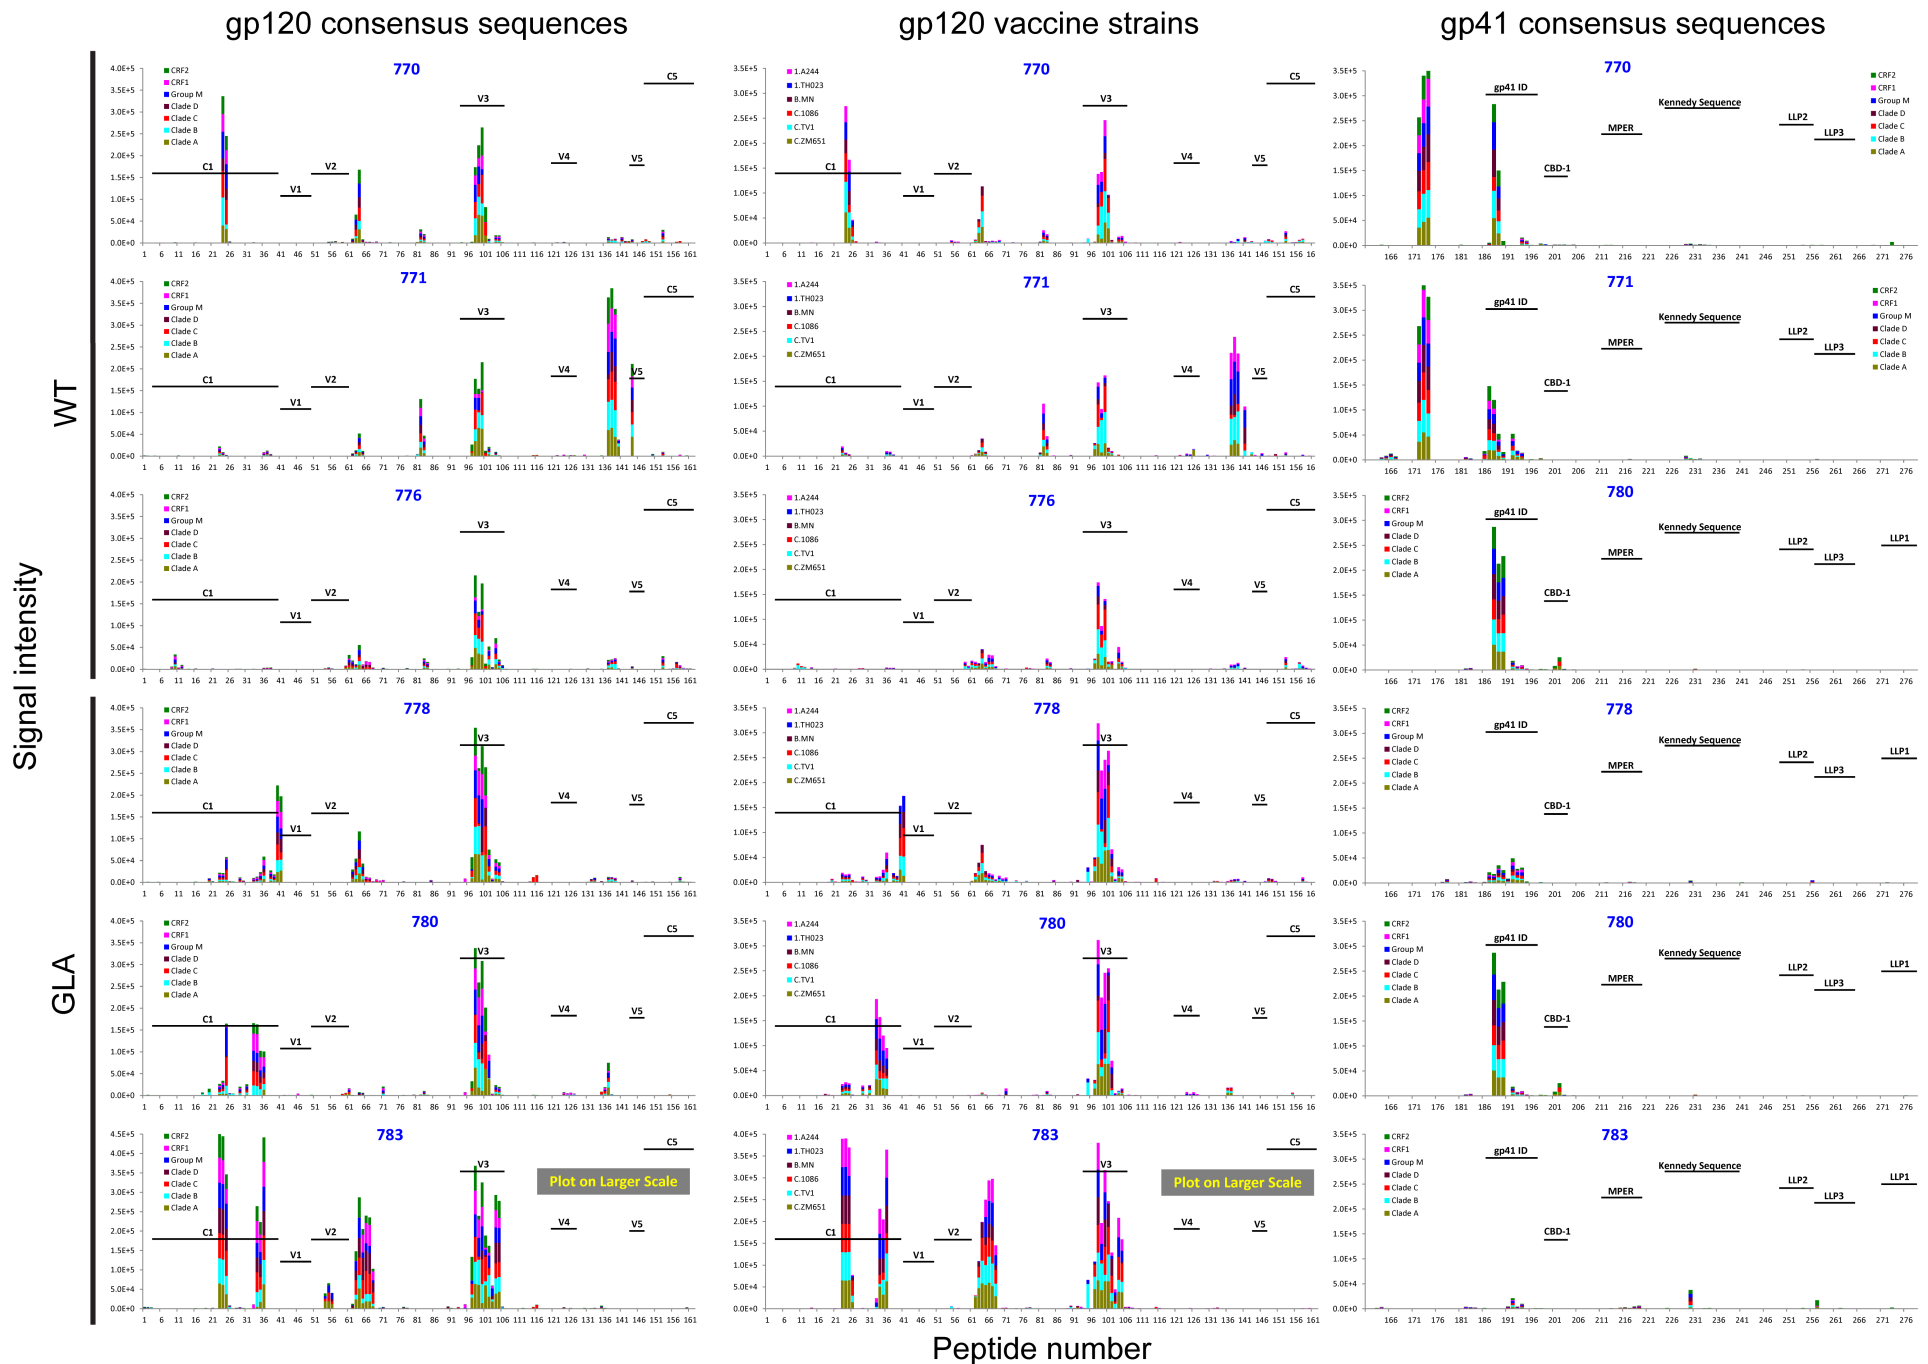

Supplementary Fig. 4: Heterologous peptide scanning of week 24 serum responses.





**Supplementary Table 2: A3R5 assay neutralization data**

| Group | Animal | Week         | Ce0393_C3.Luc   | CAP45.2.00.G3.  | Ce1086_B2.Luc  | DU151.2.LucR.T | Ce2010_F5.Luc  | Du422.1.LucR.T | Ce0393_C3.Luc   |
|-------|--------|--------------|-----------------|-----------------|----------------|----------------|----------------|----------------|-----------------|
|       |        |              | R.T2A.ecto      | LucR.T2A.ecto   | R.T2A.ecto     | 2A.ecto        | R.T2A.ecto     | 2A.ecto        | R.T2A.ecto      |
|       |        | Tier (Clade) | Tier 1A Clade C | Tier 1B Clade C | Tier 2 Clade C | Tier 1A Clade C |
| WT    | 770    | -1           | 14              | <10             | 16             | 28             | 21             | 22             | 14              |
|       |        | 14           | 493             | 119             | 80             | 83             | 63             | 100            | 493             |
|       |        | 24           | 742             | 153             | 137            | 96             | 79             | 121            | 742             |
|       | 771    | -1           | <10             | <10             | <10            | 20             | <10            | 15             | <10             |
|       |        | 14           | 240             | 67              | 82             | 10             | 39             | 10             | 240             |
|       |        | 24           | 427             | 220             | 139            | 71             | 47             | 67             | 427             |
|       | 772    | -1           | 14              | <10             | 22             | 25             | 22             | 23             | 14              |
|       |        | 14           | 451             | 131             | 113            | 10             | 10             | 76             | 451             |
|       |        | 24           | 827             | 182             | 164            | 77             | 67             | 132            | 827             |
|       | 773    | -1           | 17              | <10             | 25             | 21             | 22             | 20             | 17              |
|       |        | 14           | 170             | 190             | 96             | 10             | 10             | 10             | 170             |
|       |        | 24           | 374             | 376             | 263            | 76             | 43             | 37             | 374             |
|       | 774    | -1           | 20              | <10             | 26             | 29             | 21             | 15             | 20              |
|       |        | 14           | 73              | 32              | 169            | 10             | 10             | 10             | 73              |
|       |        | 24           | 256             | 120             | 71             | 45             | 43             | 50             | 256             |
|       | 775    | -1           | 16              | <10             | 27             | 21             | 15             | 17             | 16              |
|       |        | 14           | 504             | 408             | 262            | 142            | 76             | 163            | 504             |
|       |        | 24           | 1042            | 186             | 143            | 56             | 46             | 111            | 1042            |
|       | 776    | -1           | 30              | 25              | 42             | 41             | 48             | 42             | 30              |
|       |        | 14           | 143             | 10              | 91             | 10             | 10             | 10             | 143             |
|       |        | 24           | 522             | 384             | 97             | 36             | 28             | 49             | 522             |
|       | 777    | -1           | 18              | 13              | 36             | 36             | 32             | 40             | 18              |
|       |        | 14           | 208             | 118             | 117            | 10             | 10             | 10             | 208             |
|       |        | 24           | 614             | 281             | 191            | 43             | 89             | 90             | 614             |

|     |            |    |      |     |     |     |     |     |      |
|-----|------------|----|------|-----|-----|-----|-----|-----|------|
| GLA | <b>778</b> | -1 | <10  | <10 | 18  | 12  | 13  | 18  | <10  |
|     |            | 14 | 131  | 35  | 64  | 10  | 10  | 10  | 131  |
|     |            | 24 | 463  | 134 | 108 | 35  | 47  | 59  | 463  |
|     | <b>779</b> | -1 | 17   | <10 | 23  | 33  | 29  | 25  | 17   |
|     |            | 14 | 719  | 40  | 106 | 10  | 10  | 10  | 719  |
|     |            | 24 | 1763 | 159 | 113 | 93  | 53  | 79  | 1763 |
|     | <b>780</b> | -1 | 30   | 35  | 40  | 29  | 39  | 30  | 30   |
|     |            | 14 | 580  | 514 | 113 | 10  | 10  | 116 | 580  |
|     |            | 24 | 1870 | 142 | 129 | 118 | 51  | 139 | 1870 |
|     | <b>781</b> | -1 | 15   | 10  | 20  | 20  | 20  | 20  | 15   |
|     |            | 14 | 123  | 95  | 91  | 10  | 10  | 10  | 123  |
|     |            | 24 | 572  | 262 | 111 | 67  | 37  | 45  | 572  |
|     | <b>782</b> | -1 | 42   | 38  | 62  | 51  | 58  | 41  | 42   |
|     |            | 14 | 551  | 10  | 10  | 10  | 10  | 10  | 551  |
|     |            | 24 | 1063 | 107 | 187 | 84  | 89  | 202 | 1063 |
|     | <b>783</b> | -1 | 14   | 12  | 28  | 23  | 14  | 13  | 14   |
|     |            | 14 | 182  | 181 | 10  | 10  | 10  | 10  | 182  |
|     |            | 24 | 1789 | 291 | 49  | 35  | 40  | 43  | 1789 |
|     | <b>784</b> | -1 | 11   | <10 | 16  | 21  | <10 | 17  | 11   |
|     |            | 14 | 346  | 73  | 117 | 10  | 34  | 76  | 346  |
|     |            | 24 | 1096 | 170 | 103 | 64  | 47  | 83  | 1096 |
|     | <b>785</b> | -1 | 34   | 27  | 39  | 36  | 41  | 37  | 34   |
|     |            | 14 | 514  | 151 | 10  | 10  | 10  | 10  | 514  |
|     |            | 24 | 2049 | 308 | 112 | 78  | 58  | 152 | 2049 |
